# Supplementary material
Source: PubMed Central journal article supplement (PMC6275142)
Supplement: NIHMS1508972-supplement-1.pdf [file NIHMS1508972-supplement-1.pdf]

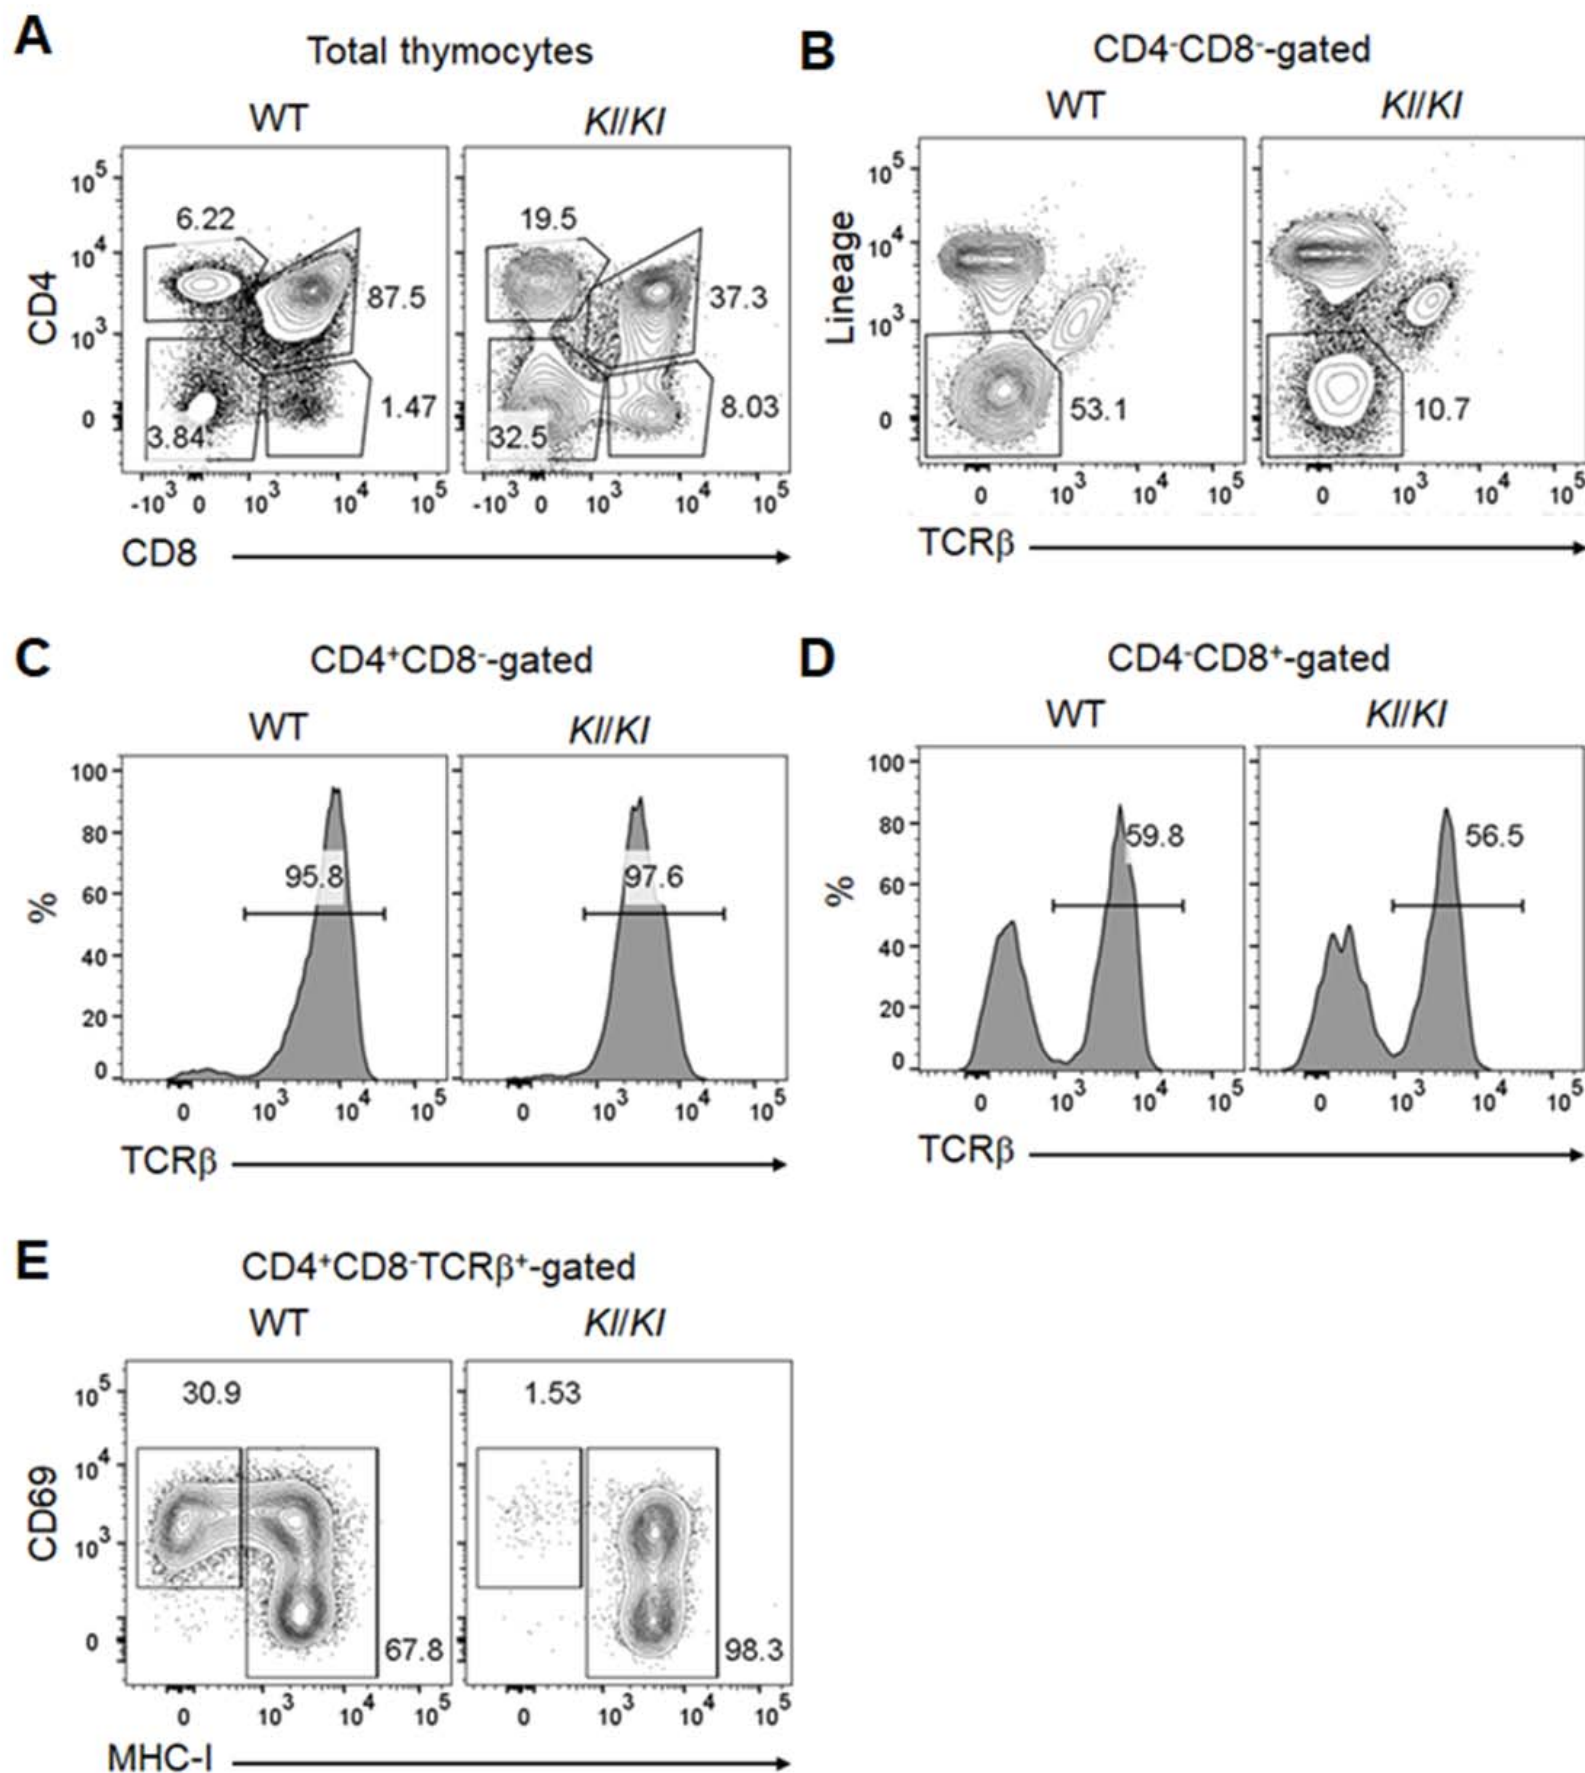

**Supplemental Fig. 1.** Gate strategy for identifying subpopulations of thymocytes on flow cytometric profiles. **(A)** Total thymocytes were identified by surface expression of CD4 and CD8 by flow cytometry. **(B)** DN population was defined by negative for CD4, CD8 and lineage markers. **(C)** CD4SP and **(D)** CD8SP were gated by TCR $\beta$ -positive. **(E)** Semi-mature (CD69<sup>+</sup>MHC-I<sup>-</sup>) and mature (CD69<sup>+</sup>MHC-I<sup>+</sup>) populations in CD4SP were identified by flow cytometry.

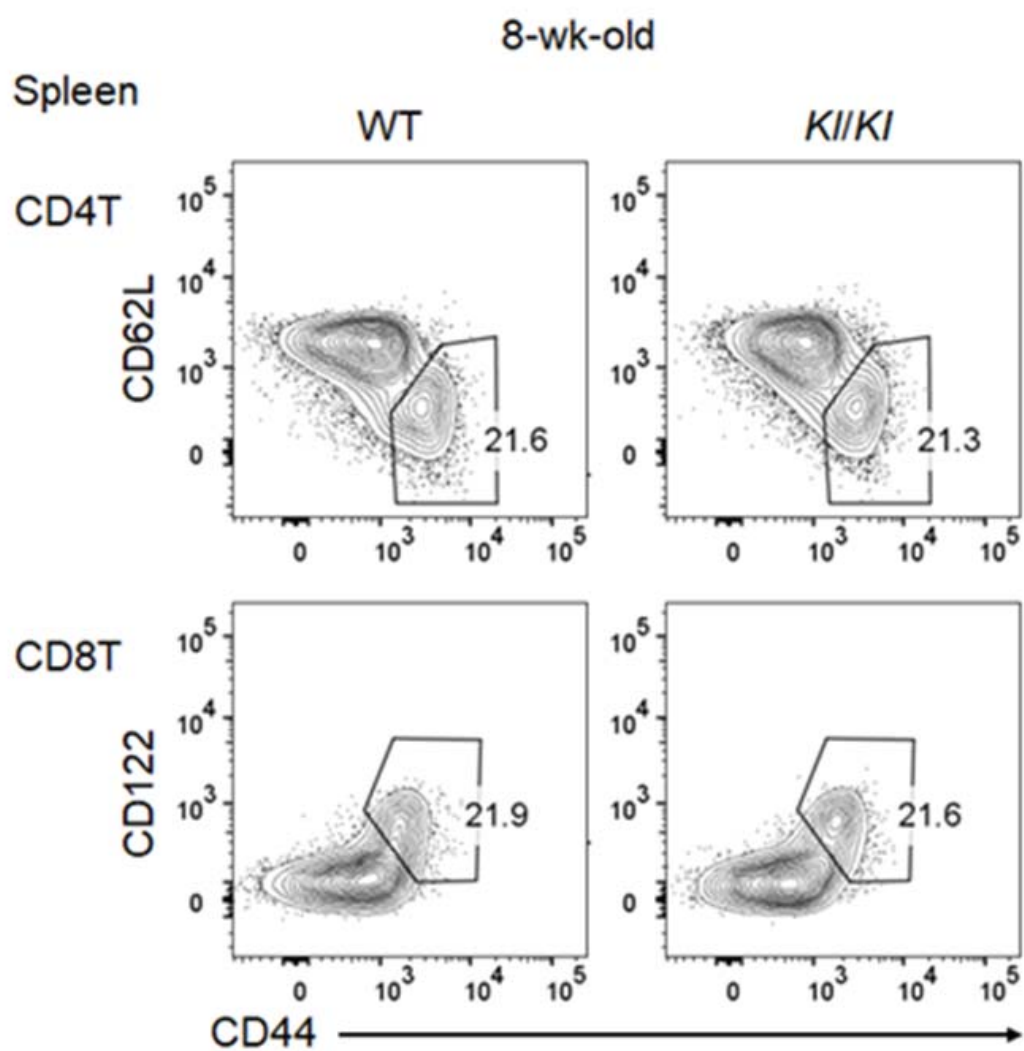

**Supplemental Fig. 2.** Gate strategy for identifying CD44<sup>hi</sup> memory-like subpopulations in CD4T and CD8T cells in the spleen on flow cytometric profiles.

**A**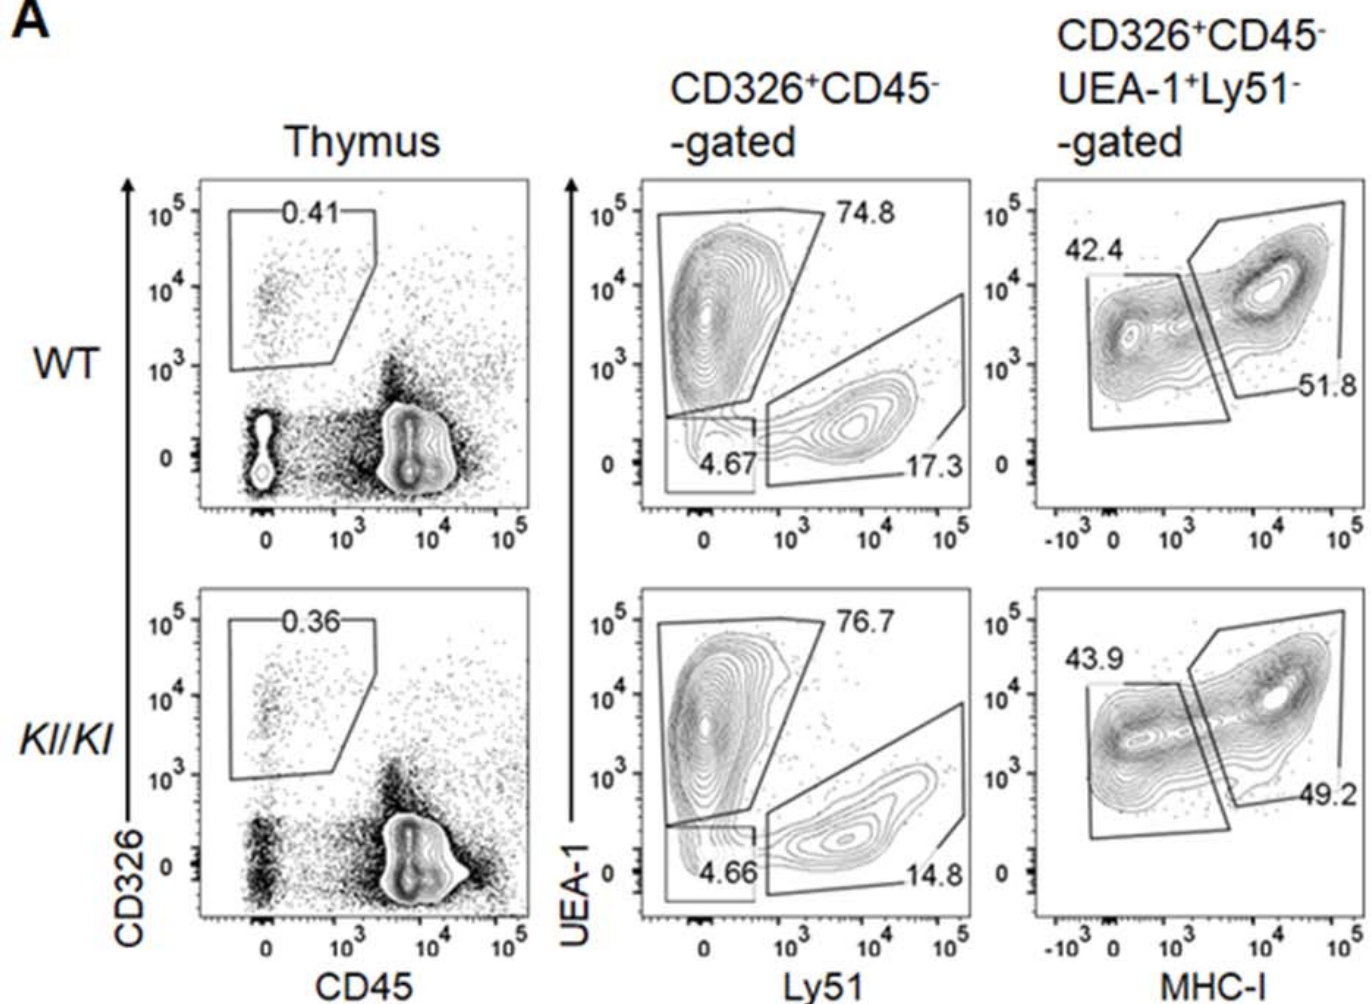**B**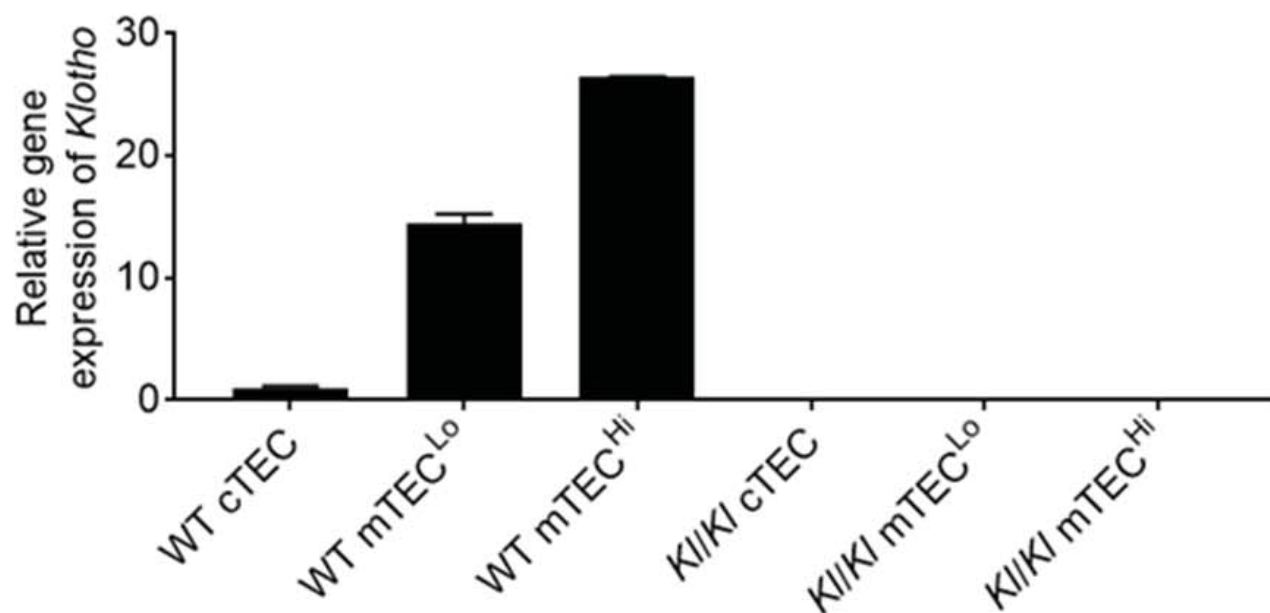

**Supplemental Fig. 3.** (A) Gate strategy for identifying cTEC (CD326<sup>+</sup>CD45<sup>-</sup>UEA-1<sup>+</sup>Ly51<sup>-</sup>), mTEC<sup>Lo</sup> (CD326<sup>+</sup>CD45<sup>-</sup>UEA-1<sup>+</sup>Ly51<sup>-</sup>MHC-I<sup>Low</sup>) and mTEC<sup>Hi</sup> (CD326<sup>+</sup>CD45<sup>-</sup>UEA-1<sup>+</sup>Ly51<sup>-</sup>MHC-I<sup>High</sup>) subpopulations in the thymus on flow cytometric profiles. (B) *Klotho* expression was quantified using real-time RT-PCR in the different populations. RNA was isolated from sorted cTEC, mTEC<sup>Lo</sup> and mTEC<sup>Hi</sup> subpopulations of 4-week-old WT and *K11KI* mice. Quantitative gene expression data were normalized to the expression levels of a housekeeping gene, Glyceraldehyde-3-phosphate dehydrogenase (*Gapdh*).
